# Supplementary material for: Design, synthesis, characterization, and fluorescent studies of the first zinc-quinolate polymerElectronic supplementary information (ESI) available: experimental information on prepared compounds and characterization. See http://www.rsc.org/suppdata/cc/b4/b402289k/
Source: Royal Society of Chemistry journal article supplement (doi:10.1039/b402289k), 2004-01-01
Supplement: b402289k.doc [file b402289k.doc]

Design, synthesis, characterization, and fluorescent studies of the first zinc-quinolate polymer

Amy Meyers, Clint South, and Marcus Weck***

Georgia Institute of Technology, School of Chemistry and Biochemistry, Atlanta, GA, 30332-0400, USA. Fax: 404-894-7452 Tel: 404-385-1796; E-mail: [marcus.weck@chemistry.gatech.edu](mailto:marcus.weck@chemistry.gatech.edu)

**General:** All chemicals were purchased from Acros Organics or Aldrich and used without further purification. Flash column chromatography was carried out on silica gel 60, 230-400 mesh (Sorbent Tech.). NMR spectra were recorded on a Varian Mercury 300 spectrometer. Gel permeation chromatography (GPC) analyses were carried out using a Waters 1525 binary pump coupled to a Waters 410 refractive index detector. The GPC was calibrated using polystyrene standards on an American Polymer Standards 10 m particle size, linear mixed bed packing columns set with CH2Cl2 as an eluent. UV/Visible spectra were obtained on a Perkin-Elmer Lambda 19 UV/VIS/NIR Spectrometer. The fluorescence spectra were obtained on a Spex Fluorolog Spectrofluorometer. Ellipsometry measurements were taken on a J. A. Woollam Co. Inc. Spectroscopic Ellipsometer, M-2000VI. Monomers **1** and **4** and the modified 8-hydroxyquinoline ligands **Naph, Quinox, CHO**, and **PVK**, as well as Alq3 and Znq2 were prepared from literature procedures.1

**Synthesis of 5-[6-Bicyclo[2.2.1]hept-5-en-2-yl-hexylamino)-methyl]-8-quinolinato-(ligand X)-zinc (2).** Monomer **1** (0.025 g, 0.07 mmol) was dissolved in 5 mL dry benzene and added dropwise to a solution of diethylzinc (0.04 mL, 0.07 mmol) in 10 mL dry benzene. The reaction was stirred for two hours under argon. The resulting precipitate was filtered off and the solvent was removed to yield a yellow solid which was used without further purification (0.03 g, 96 % yield). One equivalent of the 8-hydroxyquinoline ligand **X** was dissolved in 10 mL dry benzene and added dropwise to one equivalent of the zinc-monomer, dissolved in 10 mL dry benzene. The solution was allowed to stir under argon for two hours, followed by the removal of the solvent to yield a solid ranging in color from bright yellow to dark orange in quantitative yields.

**5-[6-Bicyclo[2.2.1]hept-5-en-2-yl-hexylamino)-methyl]-8-quinolinato-(8-hydroxyquinoline)-zinc (Znq2)**. 1H NMR (300 MHz, CDCl3) δ 8.73 (2H, m); 8.60 (1H, m); 8.12 (1H, m); 7.44 (2H, m); 7.32 (2H, m); 7.21 (2H, m); 7.04 (1H, m); 6.11 (1H endo, dd, *J* = 2.74, 5.49); 6.06-5.99 (2H exo, m); 5.90 (1H endo, dd, *J* = 2.74, 5.49); 4.10 (1H, s); 2.73 (2H, s); 2.71 (2H, t, *J* = 7.14); 1.99-1.02 (12H, m); 0.49-0.43 (1H, m). 13C NMR (75 MHz, CDCl3)  153.47; 147.90; 146.87; 139.12; 137.15; 132.88; 132.44; 128.62; 127.22; 121.78; 117.74; 111.32; 50.39; 49.83; 45.68; 42.83; 39.04; 35.06; 32.75; 30.16; 28.9227.17; 25.95.

**5-[6-Bicyclo[2.2.1]hept-5-en-2-yl-hexylamino)-methyl]-8-quinolinato-(5-formyl-8-hydroxyquinoline)-zinc (CHO).** 1H NMR (300 MHz, CDCl3) δ 10.01 (1H, m); 8.78 (2H, dd, *J* = 4.94, 19.28); 8.07 (2H, m); 7.71 (2H, dd, *J* = 4.39, 8.24); 7.51 (2H, m); 7.16 (2H, m); 6.11 (1H endo, dd, *J* = 2.74, 5.49); 6.06-5.99 (2H exo, m); 5.90 (1H endo, dd, *J* = 2.74, 5.49); 4.10 (1H, s); 2.73 (2H, s); 2.71 (2H, t, *J* = 7.14); 1.99-1.02 (12H, m); 0.49-0.43 (1H, m). 13C NMR (75 MHz, CDCl3)  190.06; 145.87; 144.78; 144.07; 143.78; 143.28; 142.86; 140.91; 140.16; 138.60; 136.81; 131.68; 126.02; 125.35; 124.60; 118.27; 112.93; 51.24; 50.03; 49.77; 45.56; 42.72; 38.49; 34.95; 32.36; 30.82; 29.92; 28.84; 27.53.

**5-[6-Bicyclo[2.2.1]hept-5-en-2-yl-hexylamino)-methyl]-8-quinolinato-(5-phenyl-vinyl-ketone-8-hydroxyquinoline)-zinc (PVK)**. 1H NMR (300 MHz, CDCl3)  8.76 (2H, m); 8.49 (1H, m); 8.17 (1H, m); 8.10 (1H, m); 7.75 (10H, m); 7.12 (1H, m); 7.03 (1H, m); 6.11 (1H endo, dd, *J* = 2.74, 5.49); 6.06-5.99 (2H exo, m); 5.90 (1H endo, dd, *J* = 2.74, 5.49); 4.10 (1H, s); 2.73 (2H, s); 2.71 (2H, t, *J* = 7.14); 1.99-1.02 (12H, m); 0.49-0.43 (1H, m). 13C NMR (75 MHz, CDCl3)  195.13; 191.36; 184.23; 183.57; 182.45; 177.65; 177.11; 174.92; 173.21; 171.39; 170.26; 168.43; 166.85; 164.31; 154.86; 150.49; 149.07; 139.02; 138.96; 137.57; 135.12; 132.62; 131.71; 131.20; 127.95; 126.29; 122.29; 118.76; 116.80; 114.34; 113.49; 50.05; 49.83; 45.68; 45.53; 42.82; 39.02; 35.03; 33.36; 32.76; 30.69; 29.75; 29.39; 28.89; 27.58; 26.93; 24.10; 23.40.

**5-[6-Bicyclo[2.2.1]hept-5-en-2-yl-hexylamino)-methyl]-8-quinolinato-(5-quinoxalinol)-zinc (Quinox)**. 1H NMR (300 MHz, CDCl3)  8.97 (4H, m); 7.72 (1H, m); 7.66 (2H, m); 7.51 (2H, m); 7.26 (1H, m); 6.11 (1H endo, dd, *J* = 2.74, 5.49); 6.06-5.99 (2H exo, m); 5.90 (1H endo, dd, *J* = 2.74, 5.49); 4.10 (1H, s); 2.73 (2H, s); 2.71 (2H, t, *J* = 7.14); 1.99-1.02 (12H, m); 0.49-0.43 (1H, m). 13C NMR (75 MHz, CDCl3)  157.38; 147.61; 146.45; 145.36; 142.68; 137.65; 137.43; 137.05; 135.88; 135.08; 132.91; 132.38; 131.06; 129.04; 115.47; 114.65; 113.15; 112.35; 49.87; 45.68; 42.80; 39.03; 35.18; 32.75; 30.69; 29.80; 28.96; 27.72; 23.46.

**5-[6-Bicyclo[2.2.1]hept-5-en-2-yl-hexylamino)-methyl]-8-quinolinato-(4-hydroxy-1,5-naphthrydine)-zinc (Naph)**. 1H NMR (300 MHz, CDCl3)  9.01 (2H, m); 7.76 (2H, m); 7.29 (1H, m); 7.10 (4H, m); 7.04 (1H, m); 6.11 (1H endo, dd, *J* = 2.74, 5.49); 6.06-5.99 (2H exo, m); 5.90 (1H endo, dd, *J* = 2.74, 5.49); 4.10 (1H, s); 2.73 (2H, s); 2.71 (2H, t, *J* = 7.14); 1.99-1.02 (12H, m); 0.49-0.43 (1H, m). 13C NMR (75 MHz, CDCl3)  158.63; 147.55; 144.92; 144.05; 139.20; 137.84; 137.52; 136.82; 135.38; 133.27; 131.72; 129.04; 128.29; 115.45; 113.26; 49.84; 45.68; 42.80; 39.06; 35.06; 32.54; 30.32; 29.26; 28.05; 27.59; 23.54.

**General polymerization procedure.**  Monomers **2** and **4** were dissolved in dry chloroform in the desired ratio. Ruthenium initiator **3** was dissolved in dry chloroform, and both solutions were combined. The polymerizations were monitored by NMR and were complete within 12 hours. All polymers were purified by repeated precipitation into dry methanol.

**Relative quantum yields measurements.** The relative quantum yields of the solutions were measured using a procedure published in reference 2. All samples were dissolved in dry chloroform and the UV/Vis spectra were taken. The concentration of the samples were adjusted with dry chloroform until the absorbance measured 0.5 for each solution, then the samples were diluted by a factor of 10 with dry chloroform. The fluorescence spectra of the diluted samples were then taken, the area under the curve was recorded, and the relative quantum yields were calculated.

**Thin film fabrication and characterization.** The concentrations of the polymers in solution were varied from 15-100 mg of polymer per mL of dry chloroform. One drop of each solution was dropped onto a quartz slide spinning at 2000 rpm. The polymer solutions that showed the highest fluorescence intensity in the solid-state ranged from 30-50 mg/mL. The films made for the ellipsometry experiment were prepared in a similar manner using gold-coated glass slides (100 nm of Au) instead of quartz slides. The film thicknesses were measured by ellipsometry by collecting data every 5 from 65 to 75 and were fitted using a Cauchy film on gold model. The resistances of the films were carried out on films casted on quartz slides and were measured using a Keithley 196 system and an Ai alessi four-point probe. The probe was lowered until it came in contact with the surface of the films and the resistance was recorded. Conductivity was determined based on the equation:  = 0.221 (R*t)-1, where R is the resistance in ohms, t is the thickness of the film in centimeters, and  is the conductivity in Siemens/cm.2

**References**

1. A. Meyers and M. Weck, *Macromolecules*, 2003, **36**, 1766-1768; G. R. Clemo and R. Howe, *J. Chem. Soc.* 1955, 3552-3553; S. K. Freeman and P. E. Spoerri, *J. Org. Chem.*, 1951, **16**, 438-442; T. D. Eck, E. L. Wehry Jr., D. M. Hercules, *J. Inorg. Nucl. Chem.* 1966, **28**, 2439-2441; T. A. Hopkins, K. Meerholz, S. Shaheen, M. L. Anderson, A. Schmidt, B. Kippelen, A. B. Padias, J. H.K. Hall, N. Peyghambarian and N. R. Armstrong, *Chem. Mater.* 1996, **8**, 344-351.
2. S. Fery-Forgues and D. Lavabre, *J. Chem. Edu.* 1999, **76**, 1260-1264.
3. F. M. Smits, *Bell Syst. Tech. J.* 1958, 710.
